# Supplementary material for: Influence of Pistachios on Performance and Exercise-Induced Inflammation, Oxidative Stress, Immune Dysfunction, and Metabolite Shifts in Cyclists: A Randomized, Crossover Trial
Source: PubMed Central journal article supplement (PMC4237504; doi:10.1371/journal.pone.0113725), 2014-11-19
Supplement: pone.0113725.s003.pdf [file pone.0113725.s003.pdf]

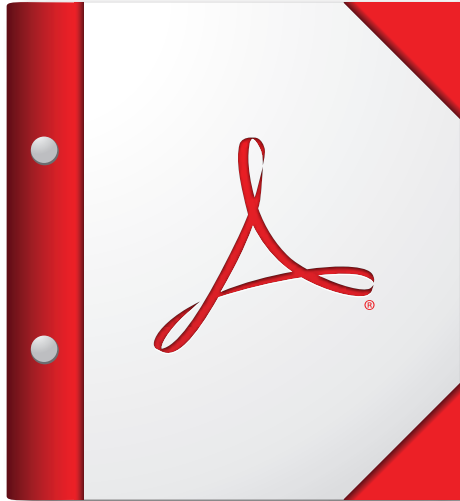

**For the best experience, open this PDF portfolio in  
Acrobat X or Adobe Reader X, or later.**

[Get Adobe Reader Now!](#)
